# Supplementary material
Source: Springer Nature journal article supplement (https://www.springermedizin.de/resource/supplementary/12936_2012_2173_MOESM6_ESM.pdf/9542802)

**A**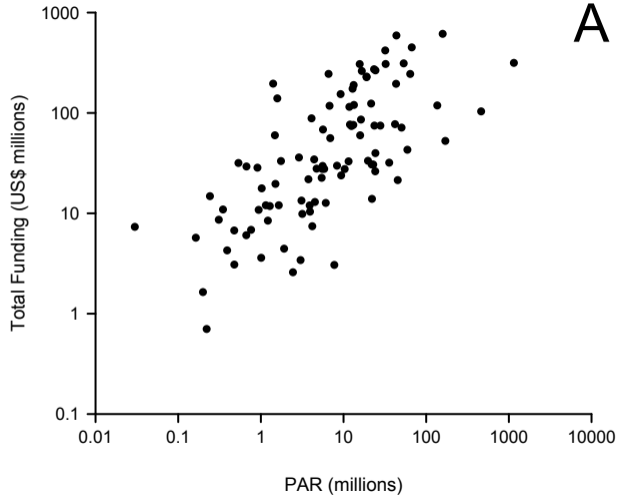**B**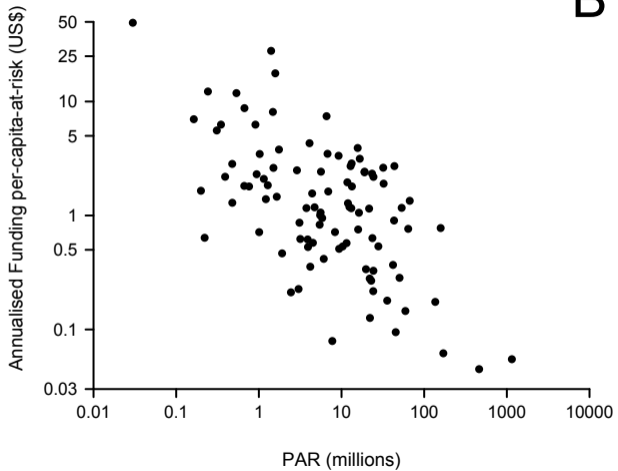

Supplement: MOESM6 [file 9542802]
